# Supplementary material for: A Bioinformatics-Based Analysis of an Anoikis-Related Gene Signature Predicts the Prognosis of Patients with Low-Grade Gliomas
Source: Brain Sci. 2022 Oct 5;12(10):1349. doi: 10.3390/brainsci12101349 (PMC9599312; doi:10.3390/brainsci12101349)
Supplement: Supplementary file 1 [file brainsci-12-01349-s001.zip]

Archive with 5 entries (5 files):
- Figure S1.pdf
- Figure S2.pdf
- table S1.xls
- table S2.xls
- table S3.xls
