# Supplementary figures and images for: A Bioinformatics-Based Analysis of an Anoikis-Related Gene Signature Predicts the Prognosis of Patients with Low-Grade Gliomas
Source: MDPI journal article supplement (doi:10.3390/brainsci12101349), 2022-10-05

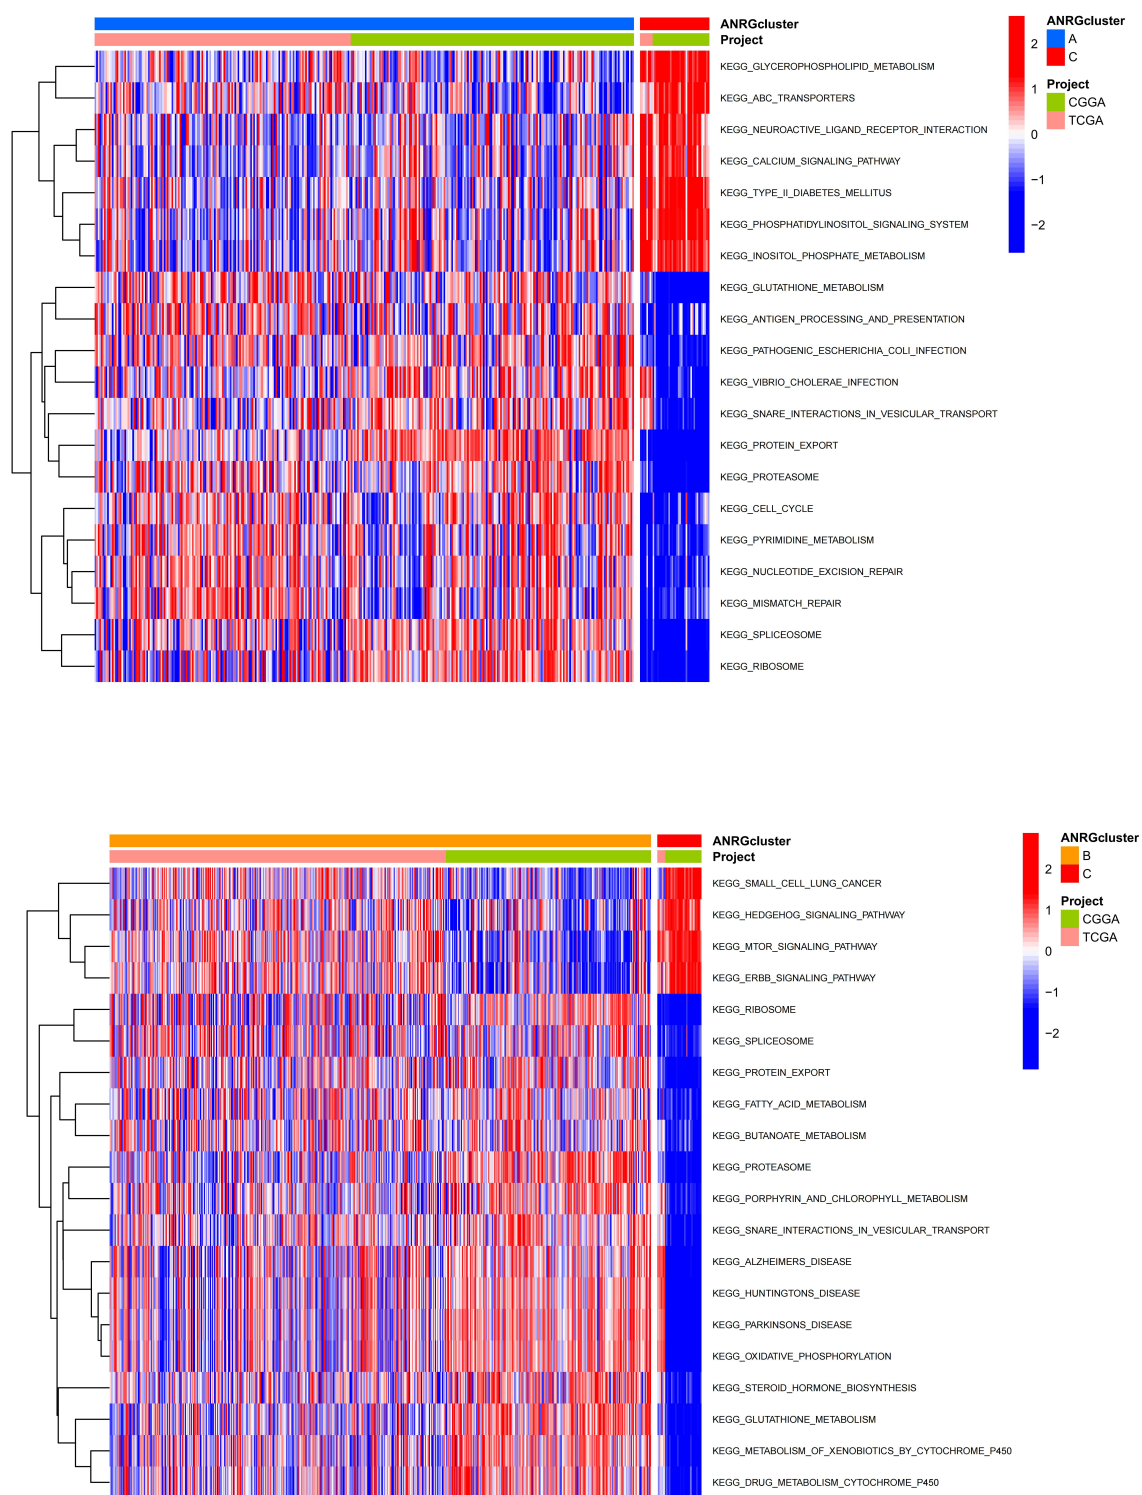

Figure S1: GSEA analysis of clusters B (or A) and C.

Supplement: s1 [file s1]

# drugSensitivity

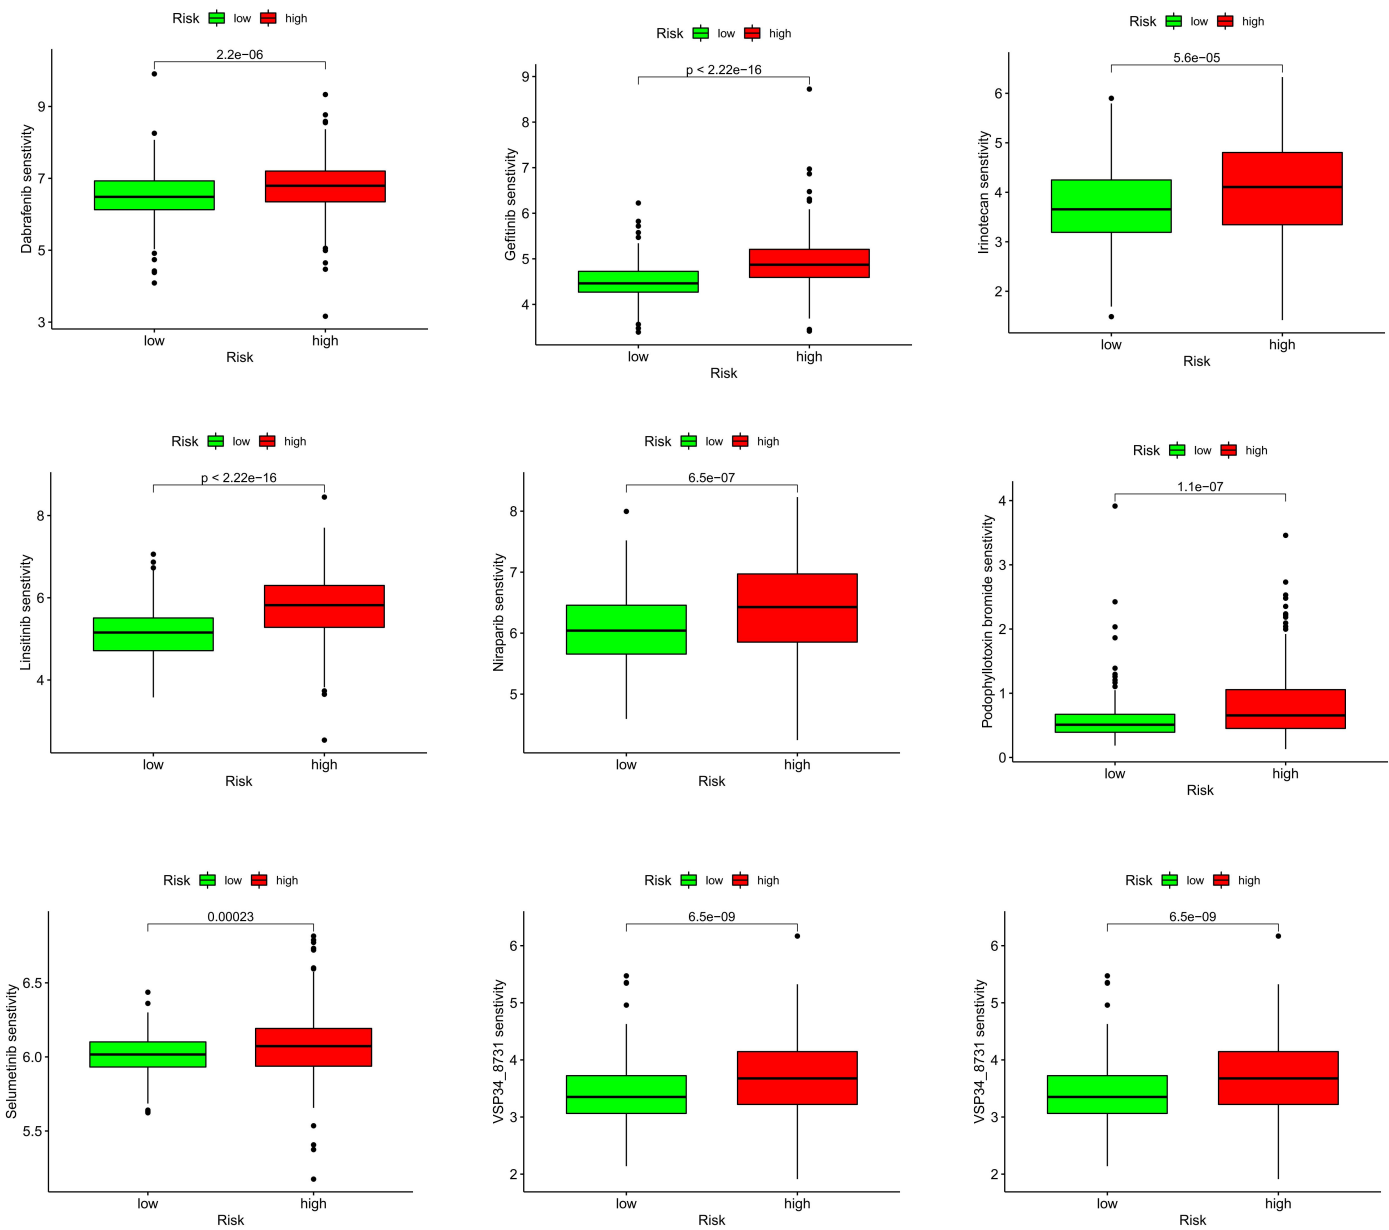

Figure S2: A drug sensitivity analysis.

Supplement: s1 [file s1]
